# Supplementary material
Source: publisher figshare collection journal article supplement (https://frontiersin.figshare.com/ndownloader/files/15203504)
Supplement: Supplementary file 1 [file 15203504]

***Supplementary Material***

**Unravelling the Scientific Debate on How to Address Wolf-Dog Hybridisation in Europe**

**Valerio Donfrancesco*, Paolo Ciucci, Valeria Salvatori, David Benson, Liselotte Wesley Andersen, Elena Bassi****et al.**

***Correspondence: Valerio Donfrancesco: donfrancesco.valerio@gmail.com**

**Supplementary Table 2.** Questions and respective responses received in Round II/III combined, in a Delphi survey on wolf x dog hybridisation (WDH), addressed to a selected group of scientists (n=42). Each question began with: “Please indicate how often you think the following should apply:”. In bold are the responses reaching consensus.

| Question | Topic | Always | Sometimes | Never | NA |
| --- | --- | --- | --- | --- | --- |
| Q1 | The mitigation of anthropogenic hybridisation should be addressed | **32** | 9 | 1 | - |
| Q2 | Admixed individuals should be defined according to their genetic profile | **30** | 10 | 2 | - |
| Q3 | A critical genetic threshold reflecting the degree of introgression (e.g. q-value by STRUCTURE) should be an available diagnosing tool for genetic analyses | **27** | 14 | - | - |
| Q4 | Individuals need to be genotyped at a genome-wide scale before any management intervention related to hybridisation may be considered | 9 | **32** | 1 | - |
| Q5 | Individuals classified as wolves by genome-wide analyses should be managed as wolves regardless of whether they bear anomalous morphological traits suspected to indicate admixture | 26 | 14 | 1 | 1 |
| Q6 | If admixed individuals are actively managed in small populations, assignment procedures should favour avoiding Type II error (i.e. erroneously classifying an admixed individual as a wolf) | **27** | 11 | 4 | - |
| Q7 | Assignment errors (i.e. Type I and II error) should be minimised by performing simulation studies before any action is taken | **27** | 10 | 4 | 1 |
| Q8 | Conservation strategies should be aimed at preserving the genetic integrity of species, so as to ensure that fundamental evolutionary and ecological processes are exempt from anthropogenic interference | **28** | 14 | 0 | - |
| Q9 | Admixed individuals should be protected if they have the same ecological role of wolves | 3 | 17 | 22 | - |
| Q10 | Admixed individuals should be protected if they have greater evolutionary potential (i.e. fitness) than parental wolves | 1 | 17 | 23 | 1 |
| Q11 | Admixed individuals should be managed by institutions, not by hunters or the general public | **33** | 8 | 1 | - |
| Q12 | Prevention (e.g. community education) should be implemented to address wolf x dog hybridisation | **37** | 5 | - | - |
| Q13 | Proactive intervention (e.g. habitat restoration, active management of free-ranging dogs) should be implemented to address wolf x dog hybridisation | **30** | 12 | - | - |
| Q14 | When wolf populations are particularly vulnerable to extinction (e.g. small and recovering), admixed individuals should be removed to address wolf x dog hybridisation | **27** | 13 | 2 | - |
| Q15 | When wolf populations are large and stable, admixed individuals should be removed to address wolf x dog hybridisation | 17 | 22 | 3 | - |
| Q16 | Capture, sterilisation and captivity should be an available management tool for stray dogs | **30** | 11 | 1 | - |
| Q17 | Capture, sterilisation and release should be an available management tool for stray dogs | 4 | 11 | **27** | - |
| Q18 | Lethal removal should be an available management tool for stray dogs | 13 | 23 | 6 | - |
| Q19 | Capture, sterilisation and captivity should be an available management tool for feral dogs | 21 | 17 | 4 | - |
| Q20 | Capture, sterilisation and release should be an available management tool for feral dogs | 4 | 11 | **27** | - |
| Q21 | Lethal removal should be an available management tool for feral dogs | 21 | 17 | 4 | - |
| Q22 | Owned free-ranging dogs should be captured and returned to their owner | **29** | 11 | 1 | - |
| Q23 | Local laws should include a set of actions demanding accountability to owners who allow their dog to be free ranging | **40** | 2 | - | - |
| Q24 | When the active management of admixed individuals is needed, capture, sterilisation and captivity should be available as a management tool | 6 | **30** | 6 | - |
| Q25 | When the management of admixed individuals is required, capture, sterilisation and release should be available as a management tool (i.e. adopting the placeholder concept) | 9 | 20 | 13 | - |
| Q26 | When the management of admixed individuals is required, lethal removal should be available as a management tool | 17 | 19 | 6 | - |
| Q27 | The sterilisation of admixed individuals, especially from a release perspective, should be performed via methods ensuring the maintenance of regular hormonal levels and the return to normal behaviours of the individuals | **28** | 7 | 5 | - |
| Q28 | It should be possible to adopt direct shooting as a method for the lethal removal of admixed individuals | 13 | 20 | 9 | - |
| Q29 | It should be possible to adopt the removal of pups from the den as a method for the lethal removal of admixed individuals | 15 | 20 | 7 | - |
| Q30 | It should be possible to adopt foothold traps followed by killing as a method for the lethal removal of admixed individuals | 7 | 20 | 15 | - |
